# Supplementary material for: Estimation of the breathing energy of flexible MOFs by combining TGA and DSC techniques
Source: Royal Society of Chemistry journal article supplement (doi:10.1039/b822834e), 2009-01-01
Supplement: b822834e.pdf [file b822834e.pdf]

## Synthesis procedure and structural characterization of the different MIL materials

### MIL-47(V) or $V^{IV}O(O_2C-C_6H_4-CO_2)$ [ $V_4O_4(O_2C-C_6H_4-CO_2)_4$ per unit-cell]

$V^{IV}O(O_2C-C_6H_4-CO_2)$  was synthesized according to the published procedure.<sup>1</sup>  $VCl_3$  and terephthalic acid were reacted in water at 200°C for 3 days. The resulting solid was washed with water, DMF, acetone and dried in air, and is formulated  $V^{III}OH(O_2C-C_6H_4-CO_2).(HO_2C-C_6H_4-CO_2H)_x$  ( $x \sim 0.75$ ). The solid was further placed in DMF at 150°C overnight (1g of solid for 50 ml of DMF), to afford after cooling down to room temperature and additional washing (DMF and acetone) the  $V^{III}OH(O_2C-C_6H_4-CO_2).(DMF)_x$  ( $x \sim 0.8$ ) solid.<sup>2</sup> Eventually,  $V^{IV}O(O_2C-C_6H_4-CO_2)$  was obtained by heating the above-mentioned solid under primary vacuum at 250°C for 2 days. Nitrogen sorption measurement at 77K indicates a Langmuir surface area of about 1450  $m^2.g^{-1}$ .

**Table S1:** Unit-cell of the different forms of MIL-47(V)

| Solid                                                                  | a (Å)     | b (Å)     | c (Å)    | V (Å <sup>3</sup> ) | Space Group | Reference |
|------------------------------------------------------------------------|-----------|-----------|----------|---------------------|-------------|-----------|
| $V^{III}OH(O_2C-C_6H_4-CO_2).(HO_2C-C_6H_4-CO_2H)_{0.75}$<br>MIL-47 as | 17.519(1) | 12.168(1) | 6.875(1) | 1465.5(1)           | P n a m     | 1         |
| $V^{IV}O(O_2C-C_6H_4-CO_2)$<br>MIL-47 (V)                              | 16.143(1) | 13.939(1) | 6.818(1) | 1534.1(1)           | P n a m     | 1         |

### MIL-53(Cr) or $Cr^{III}OH(O_2C-C_6H_4-CO_2)$ [ $Cr_4(OH)_4(O_2C-C_6H_4-CO_2)_4$ per unit-cell]

$Cr^{III}(OH)(O_2C-C_6H_4-CO_2)$  was synthesized according to the published procedure.<sup>3</sup>  $Cr(NO_3)_3 \cdot 9H_2O$ , terephthalic acid and hydrofluoric acid were reacted in water at 220°C for 3 days. The resulting solid was washed with water, DMF, acetone and dried in air, and is formulated  $CrOH(O_2C-C_6H_4-CO_2).(HO_2C-C_6H_4-CO_2H)_x$  ( $x \sim 0.75$ ). The solid was further placed in DMF at 150°C overnight (1g of solid for 50 ml of DMF), to afford after cooling down to room temperature and additional washing (DMF and acetone)  $CrOH(O_2C-C_6H_4-CO_2).(DMF)_x$  ( $x \sim 0.8$ ).<sup>2</sup> Eventually,  $CrOH(O_2C-C_6H_4-CO_2)$  was obtained by heating the above-mentioned solid under primary vacuum at 250°C for 2 days. Nitrogen sorption measurement at 77K indicates a Langmuir surface area of about 1400  $m^2.g^{-1}$ . The solid let in air afforded  $Cr^{III}(OH)(O_2C-C_6H_4-CO_2).(H_2O)$ , while redispersed in water, this leads to  $Cr^{III}(OH)(O_2C-C_6H_4-CO_2).n(H_2O)$  ( $n \sim 4$ ) or MIL-53(Cr)(H<sub>2</sub>O)open.

**Table S2:** Unit-cell of the different forms of MIL-53(Cr):

| Solid                                                                                                                                                                                    | a (Å)     | b (Å)     | c (Å)    | $\beta$ (°) | V (Å <sup>3</sup> ) | Space Group | Reference              |
|------------------------------------------------------------------------------------------------------------------------------------------------------------------------------------------|-----------|-----------|----------|-------------|---------------------|-------------|------------------------|
| Cr <sup>III</sup> OH(O <sub>2</sub> C-C <sub>6</sub> H <sub>4</sub> -CO <sub>2</sub> ).(HO <sub>2</sub> C-C <sub>6</sub> H <sub>4</sub> -CO <sub>2</sub> H) <sub>0.75</sub><br>MIL-53 as | 17.340(1) | 12.178(1) | 6.822(1) | -           | 1440.6(1)           | P n a m     | 3                      |
| Cr <sup>III</sup> (OH)(O <sub>2</sub> C-C <sub>6</sub> H <sub>4</sub> -CO <sub>2</sub> )<br>MIL-53ht<br>labelled MIL-53 <sub>lp</sub> (Cr)                                               | 16.733(1) | 13.038(1) | 6.812    | -           | 1486.1(1)           | I m c m     | 3                      |
| Cr <sup>III</sup> (OH)(O <sub>2</sub> C-C <sub>6</sub> H <sub>4</sub> -CO <sub>2</sub> ).(H <sub>2</sub> O)<br>MIL-53lt<br>labelled MIL-53 <sub>np</sub> (Cr)                            | 19.685(1) | 7.849(1)  | 6.782    | 104.9(1)    | 1012.0(1)           | C 2/c       | 3                      |
| Cr <sup>III</sup> (OH)(O <sub>2</sub> C-C <sub>6</sub> H <sub>4</sub> -CO <sub>2</sub> ).n(H <sub>2</sub> O)<br>MIL-53(H <sub>2</sub> O)open<br>labelled MIL-53 <sub>lp</sub> (Cr)       | 15.80(1)  | 14.15(1)  | 6.83(1)  | -           | 1527.2(1)           | I m c m     | unpublished<br>results |

*lp = large pore, np = narrow pore*

**MIL-53(Fe) or Fe<sup>III</sup>(OH)(O<sub>2</sub>C-C<sub>6</sub>H<sub>4</sub>-CO<sub>2</sub>) [Fe<sub>4</sub>(OH)(O<sub>2</sub>C-C<sub>6</sub>H<sub>4</sub>-CO<sub>2</sub>)<sub>4</sub> per unit-cell]**

Fe<sup>III</sup>(OH)(O<sub>2</sub>C-C<sub>6</sub>H<sub>4</sub>-CO<sub>2</sub>) was synthesized according to the published procedure.<sup>4</sup> FeCl<sub>3</sub>·xH<sub>2</sub>O and terephthalic acid (1, 1 mmol of each in 5 ml of DMF) were reacted in DMF at 150°C for 1 days. The resulting solid was washed with water, DMF, acetone and dried in air, and is formulated Fe<sup>III</sup>(OH)(O<sub>2</sub>C-C<sub>6</sub>H<sub>4</sub>-CO<sub>2</sub>)(DMF)<sub>x</sub> (x ~ 0.8). DMF was exchanged by deionised water at room temperature (1 g of the solid in 0.5 l of water) to afford Fe<sup>III</sup>(OH)(O<sub>2</sub>C-C<sub>6</sub>H<sub>4</sub>-CO<sub>2</sub>)·(H<sub>2</sub>O). Eventually, Fe<sup>III</sup>(OH)(O<sub>2</sub>C-C<sub>6</sub>H<sub>4</sub>-CO<sub>2</sub>)·x(H<sub>2</sub>O) (0<x<0.5) and Fe<sup>III</sup>(OH)(O<sub>2</sub>C-C<sub>6</sub>H<sub>4</sub>-CO<sub>2</sub>) was obtained by heating the above-mentioned solid in air at 50°C and 150°C, respectively. Nitrogen sorption measurement at 77K indicates no permanent microporosity.

**Table S3:** Unit cell parameters of the different forms of MIL-53(Fe)

| Solid                                                                                                                                                             | a (Å)     | b (Å)     | c (Å)     | $\alpha$ (°) | $\beta$ (°) | V (Å <sup>3</sup> ) | Space Group | Ref. |
|-------------------------------------------------------------------------------------------------------------------------------------------------------------------|-----------|-----------|-----------|--------------|-------------|---------------------|-------------|------|
| Fe <sup>III</sup> (OH)(O <sub>2</sub> C-C <sub>6</sub> H <sub>4</sub> -CO <sub>2</sub> )<br>MIL-53(Fe)ht<br>labelled MIL-53 <i>vnp</i> (Fe)                       | 21.269(1) | 6.760(1)  | 6.884(2)  | -            | 114.62(1)   | 899.6(1)            | C2/c        | 5    |
| Fe <sup>III</sup> (OH)(O <sub>2</sub> C-C <sub>6</sub> H <sub>4</sub> -CO <sub>2</sub> ). x(H <sub>2</sub> O)<br>(0 < x < 0.5)<br>labelled MIL-53 <i>int</i> (Fe) | 6.886(5)  | 10.557(9) | 13.466(2) | 109.85(6)    | 88.05(6)    | 892.4(1)            | P-1         | 5    |
| Fe <sup>III</sup> (OH)(O <sub>2</sub> C-C <sub>6</sub> H <sub>4</sub> -CO <sub>2</sub> ).(H <sub>2</sub> O)<br>MIL-53(Fe)lt<br>labelled MIL-53 <i>np</i> (Fe)     | 19.320(1) | 15.036(1) | 6.835(1)  | -            | 96.30(1)    | 1973.5(1)*          | C2/c        | 5    |

*np* = narrow pore, *int* = intermediate pore, *vnp* = very narrow pore  
\* for a 1x2x1 unit cell

**Figure S1:** Crystal structures of the MIL-47(V), MIL-53(Cr) (*lp* and *np* versions) and MIL-53(Fe) (*np*, *int* and *vnp* versions) upon water desorption.

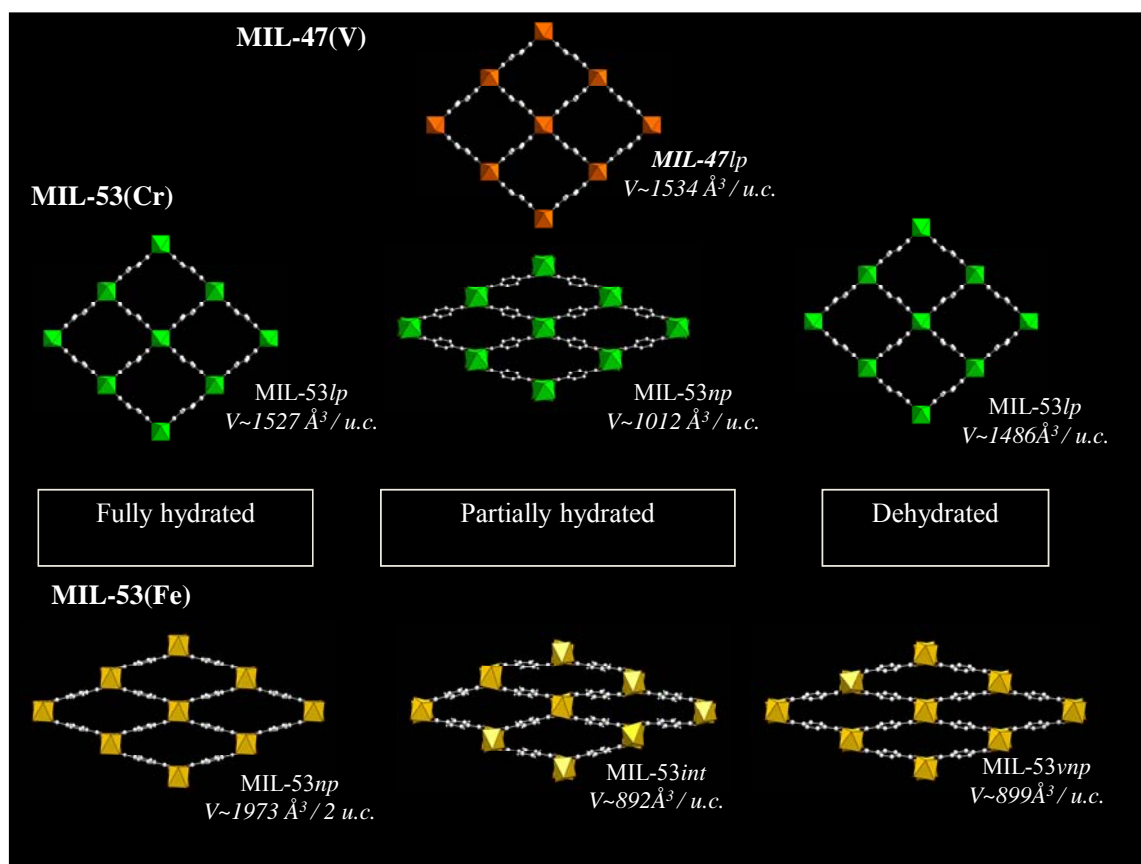

- <sup>1</sup> K. Barthelet, J. Marrot, D. Riou and G. Férey, *Angew. Chem. Int. Ed.*, 2002, **41**, 281.
- <sup>2</sup> C. Serre, S. Bourrelly, A. Vimont, N. A. Ramsahye, G. Maurin, P.L. Llewellyn, M. Daturi, Y. Filinchuk, O. Leynaud, P. Barnes and G. Férey, *Adv. Mater.*, 2007, **19**, 2246.
- <sup>3</sup> C. Serre, F. Millange, C. Thouvenot, M. Noguès, G. Marsolier, D. Louër and G. Férey, *J. Am. Chem. Soc.*, 2002, **124**, 13519.
- <sup>4</sup> G. Férey, F. Millange, M. Morcrette, C. Serre, M.-L. Doublet, J.-M. Grenèche, J.-M. Tarascon, *Angew. Chem. Int. Ed.*, 2007, **46**, 3259.
- <sup>5</sup> F. Millange, N. Guillou, R. I. Walton, J.-M. Grenèche, G. Férey, *Chem. Commun.*, 2008, 4732.
